# Supplementary material for: Solvent-induced deviation in square-grid layers of microporous Cu(ii) isophthalates: layer stacking and gas adsorption properties
Source: Royal Society of Chemistry journal article supplement (doi:10.1039/c0ce00150c), 2010-09-22
Supplement: c0ce00150c.pdf [file c0ce00150c.pdf]

## *Supporting Information*

# **Solvent-Induced Deviation in Square-Grid Layers of Microporous Cu(II) Isophthalates: Layer Stacking and Gas Adsorption Properties**

Rui-Qin Zhong,<sup>†,‡</sup> Ru-Qiang Zou,<sup>†,‡</sup> and Qiang Xu<sup>\*,†,‡</sup>

<sup>†</sup> *National Institute of Advanced Industrial Science and Technology (AIST), Ikeda, Osaka 563-8577, Japan*

<sup>‡</sup> *Graduate School of Engineering, Kobe University, Nada Ku, Kobe, Hyogo 657-8501, Japan*

**Table 1S Bond Distances (Å) and Angles (deg) of Metal Coordination in Complexes 1-5**


---

| <b>1</b>             |            |                      |           |
|----------------------|------------|----------------------|-----------|
| Cu(1)-O(2)           | 1.962(2)   | Cu(1)-O(1)#2         | 1.967(2)  |
| Cu(1)-O(1W)          | 2.124(3)   | Cu(1)-Cu(1)#3        | 2.6130(9) |
| O(2)#1-Cu(1)-O(2)    | 88.21(15)  | O(2)-Cu(1)-O(1)#3    | 168.34(9) |
| O(2) #1-Cu(1)-O(1)#3 | 89.60(12)  | O(1)#2-Cu(1)-O(1)#3  | 90.25(18) |
| O(2)-Cu(1)-O(1W)     | 93.71(9)   | O(1)#2-Cu(1)-O(1W)   | 97.86(9)  |
| O(2)-Cu(1)-Cu(1)#3   | 81.72(7)   | O(1)#2-Cu(1)-Cu(1)#3 | 86.63(7)  |
| O(1W)-Cu(1)-Cu(1)#3  | 173.60(10) |                      |           |
| <b>2</b>             |            |                      |           |
| Cu(1)-O(2)           | 1.961(6)   | Cu(1)-O(1)#2         | 1.966(6)  |
| Cu(1)-O(3)           | 2.139(8)   | Cu(1)-Cu(1)#3        | 2.604(2)  |
| O(2)-Cu(1)-O(2)#1    | 90.8(5)    | O(2)-Cu(1)-O(1)#2    | 89.2(3)   |
| O(2)-Cu(1)-O(1)#3    | 168.4(3)   | O(1)#2-Cu(1)-O(1)#3  | 88.4(4)   |
| O(2)-Cu(1)-O(3)      | 97.8(2)    | O(1)#2-Cu(1)-O(3)    | 93.8(2)   |
| O(2)-Cu(1)-Cu(1)#3   | 86.44(19)  | O(1)#2-Cu(1)-Cu(1)#3 | 81.93(18) |
| O(3)-Cu(1)-Cu(1)#3   | 174.0(2)   |                      |           |
| <b>3</b>             |            |                      |           |

---

---

|                     |           |                    |           |
|---------------------|-----------|--------------------|-----------|
| Cu(1)-O(1)          | 1.945(11) | Cu(1)-O(3)#2       | 1.955(11) |
| Cu(1)-O(7)#1        | 1.953(12) | Cu(1)-O(5)         | 1.956(11) |
| Cu(1)-O(1W)         | 2.166(3)  | Cu(1)-Cu(2)        | 2.616(3)  |
| Cu(2)-O(8)#1        | 1.923(11) | Cu(2)-O(2)         | 1.958(11) |
| Cu(2)-O(6)          | 1.962(11) | Cu(2)-O(4)#2       | 1.966(11) |
| Cu(2)-O(9)          | 2.166(13) |                    |           |
| O(1)-Cu(1)-O(3)#2   | 167.9(5)  | O(1)-Cu(1)-O(7)#1  | 89.7(5)   |
| O(3)#2-Cu(1)-O(7)#1 | 88.8(5)   | O(1)-Cu(1)-O(5)    | 91.5(5)   |
| O(3)#2-Cu(1)-O(5)   | 87.6(5)   | O(7)#1-Cu(1)-O(5)  | 168.3(5)  |
| O(1)-Cu(1)-O(1W)    | 87.4(5)   | O(3)#2-Cu(1)-O(1W) | 104.7(5)  |
| O(7)#1-Cu(1)-O(1W)  | 91.6(5)   | O(5)-Cu(1)-O(1W)   | 100.1(5)  |
| O(1)-Cu(1)-Cu(2)    | 80.4(4)   | O(3)#2-Cu(1)-Cu(2) | 87.5(4)   |
| O(7)#1-Cu(1)-Cu(2)  | 80.4(4)   | O(5)-Cu(1)-Cu(2)   | 88.3(4)   |
| O(1W)-Cu(1)-Cu(2)   | 165.3(3)  | O(8)#1-Cu(2)-O(2)  | 87.9(5)   |
| O(8)#1-Cu(2)-O(6)   | 167.2(5)  | O(2)-Cu(2)-O(6)    | 92.3(5)   |
| O(8)#1-Cu(2)-O(4)#2 | 88.4(5)   | O(2)-Cu(2)-O(4)#2  | 169.3(5)  |
| O(6)-Cu(2)-O(4)#2   | 89.1(5)   | O(8)#1-Cu(2)-O(9)  | 101.0(5)  |
| O(2)-Cu(2)-O(9)     | 93.3(5)   | O(6)-Cu(2)-O(9)    | 91.7(5)   |

---

---

|                      |           |                      |            |
|----------------------|-----------|----------------------|------------|
| O(4)#2-Cu(2)-O(9)    | 97.2(5)   | O(8)#1-Cu(2)-Cu(1)   | 87.5(42)   |
| O(2)-Cu(2)-Cu(1)     | 88.6(3)   | O(6)-Cu(2)-Cu(1)     | 79.8(3)    |
| O(4)#1-Cu(2)-Cu(1)   | 81.3(3)   | O(9)-Cu(2)-Cu(1)     | 171.4(4)   |
| <b>4</b>             |           |                      |            |
| Cu(1)-O(4)#1         | 1.953(6)  | Cu(1)-O(8)#2         | 1.963(6)   |
| Cu(1)-O(7)#3         | 1.988(6)  | Cu(1)-O(3)           | 1.991(5)   |
| Cu(1)-O(9)           | 2.127(7)  | Cu(1)-Cu(1)#1        | 2.6404(18) |
| Cu(2)-O(6)           | 1.966(5)  | Cu(2)-O(2)           | 1.980(5)   |
| Cu(2)-O(1W)          | 2.141(8)  | Cu(2)-Cu(3)          | 2.6494(18) |
| Cu(3)-O(1)           | 1.940(5)  | Cu(3)-O(5)           | 1.969(5)   |
| Cu(3)-O(11)          | 2.094(9)  |                      |            |
| O(4)#1-Cu(1)-O(8)#2  | 170.3(3)  | O(4)#1-Cu(1)-O(7)#3  | 90.0(3)    |
| O(8)#2-Cu(1)-O(7)#3  | 89.4(3)   | O(4)#1-Cu(1)-O(3)    | 88.7(2)    |
| O(8)#2-Cu(1)-O(3)    | 89.5(3)   | O(7)#3-Cu(1)-O(3)    | 165.7(3)   |
| O(4)#1-Cu(1)-O(9)    | 95.8(3)   | O(8)#2-Cu(1)-O(9)    | 93.8(3)    |
| O(7)#3-Cu(1)-O(9)    | 103.1(3)  | O(3)-Cu(1)-O(9)      | 91.2(2)    |
| O(4)#1-Cu(1)-Cu(1)#1 | 86.97(18) | O(8)#2-Cu(1)-Cu(1)#1 | 83.36(18)  |
| O(7)#3-Cu(1)-Cu(1)#1 | 84.54(18) | O(3)-Cu(1)-Cu(1)#1   | 81.16(17)  |

---

---

|                    |            |                   |           |
|--------------------|------------|-------------------|-----------|
| O(9)-Cu(1)-Cu(1)#1 | 171.83(19) | O(6)#4-Cu(2)-O(6) | 91.8(4)   |
| O(6)#4-Cu(2)-O(2)  | 167.4(3)   | O(6)-Cu(2)-O(2)   | 87.7(2)   |
| O(2)-Cu(2)-O(2)#4  | 90.1(3)    | O(6)-Cu(2)-O(1W)  | 95.9(2)   |
| O(2)-Cu(2)-O(1W)   | 96.7(3)    | O(6)-Cu(2)-Cu(3)  | 81.89(17) |
| O(2)-Cu(2)-Cu(3)   | 85.59(18)  | O(1W)-Cu(2)-Cu(3) | 176.8(3)  |
| O(1)-Cu(3)-O(1)#4  | 90.3(4)    | O(1)-Cu(3)-O(5)#4 | 167.7(3)  |
| O(1)-Cu(3)-O(5)    | 88.2(3)    | O(5)#4-Cu(3)-O(5) | 90.7(4)   |
| O(1)-Cu(3)-O(11)   | 95.3(3)    | O(5)-Cu(3)-O(11)  | 96.9(2)   |
| O(1)-Cu(3)-Cu(2)   | 81.88(19)  | O(5)-Cu(3)-Cu(2)  | 85.86(17) |
| O(11)-Cu(3)-Cu(2)  | 176.0(2)   |                   |           |

**5**

|              |          |               |            |
|--------------|----------|---------------|------------|
| Cu(1)-O(2)#1 | 1.954(3) | Cu(1)-O(1)    | 1.959(3)   |
| Cu(1)-O(6)#1 | 1.969(3) | Cu(1)-O(5)    | 1.980(3)   |
| Cu(1)-N(1)   | 2.206(4) | Cu(1)-Cu(1)#1 | 2.6469(11) |
| Cu(2)-O(8)   | 1.964(3) | Cu(2)-O(7)#3  | 1.969(3)   |
| Cu(2)-O(1W)  | 2.147(5) | Cu(2)-Cu(2)#3 | 2.6193(15) |
| Cu(3)-O(4)   | 1.953(4) | Cu(3)-O(3)#5  | 1.954(4)   |
| Cu(3)-O(2W)  | 2.211(7) | Cu(3)-Cu(3)#5 | 2.6429(16) |

---

---

|                      |            |                      |            |
|----------------------|------------|----------------------|------------|
| O(2)#1-Cu(1)-O(1)    | 167.92(14) | O(2)#1-Cu(1)-O(6)#1  | 89.50(15)  |
| O(1)-Cu(1)-O(6)#1    | 88.22(15)  | O(2)#1-Cu(1)-O(5)    | 88.14(15)  |
| O(1)-Cu(1)-O(5)      | 91.61(14)  | O(6)#1-Cu(1)-O(5)    | 167.85(13) |
| O(2)#1-Cu(1)-N(1)    | 101.49(15) | O(1)-Cu(1)-N(1)      | 90.55(15)  |
| O(6)#1-Cu(1)-N(1)    | 96.47(15)  | O(5)-Cu(1)-N(1)      | 95.68(15)  |
| O(2)#1-Cu(1)-Cu(1)#1 | 87.74(10)  | O(1)-Cu(1)-Cu(1)#1   | 80.28(10)  |
| O(6)#1-Cu(1)-Cu(1)#1 | 86.70(10)  | O(5)-Cu(1)-Cu(1)#1   | 81.31(10)  |
| N(1)-Cu(1)-Cu(1)#1   | 170.23(12) | O(8)-Cu(2)-O(8)#2    | 90.1(2)    |
| O(8)-Cu(2)-O(7)#3    | 168.69(14) | O(8)-Cu(2)-O(7)#4    | 88.46(15)  |
| O(7)#3-Cu(2)-O(7)#4  | 90.8(2)    | O(8)-Cu(2)-O(1W)     | 95.52(16)  |
| O(3)#5-Cu(3)-O(3)#6  | 90.9(2)    | O(7)#3-Cu(2)-O(1W)   | 95.79(16)  |
| O(8)-Cu(2)-Cu(2)#3   | 84.40(10)  | O(7)#3-Cu(2)-Cu(2)#3 | 84.29(10)  |
| O(1W)-Cu(2)-Cu(2)#3  | 179.88(19) | O(4)#2-Cu(3)-O(4)    | 91.4(3)    |
| O(4)#2-Cu(3)-O(3)#5  | 168.04(16) | O(4)-Cu(3)-O(3)#5    | 87.60(18)  |
| O(4)-Cu(3)-O(2W)     | 94.9(2)    | O(3)#5-Cu(3)-O(2W)   | 97.1(2)    |
| O(4)-Cu(3)-Cu(3)#6   | 83.24(11)  | O(3)#5-Cu(3)-Cu(3)#6 | 84.81(11)  |
| O(2W)-Cu(3)-Cu(3)#6  | 177.3(3)   |                      |            |

---

Symmetry transformations used to generate equivalent atoms: **1**: #1  $y, x, z$ ; #2  $-y+1, -x+1, -z$ ; #3  $-x+1, -y+1, -z$ ; **2**: #1  $y, x, z$ ; #2  $-y+1, -x+1, -z+1$ ; #3  $-x+1, -y+1, -z+1$ ; **3**: #1  $x-1/2, -y+1/2, -z+1$ ; #2  $x, -y+1/2, z+1/2$ ; **4**: #1  $-x+1/2, y, -z+1/2$ ; #2  $x, y+1/2, -z+1/2$ ; #3  $-x+1/2, y+1/2, z$ ; #4  $-x, y, z$ ;

7

5: #1  $-x+3/2, -y+3/2, -z+2$ ; #2  $x, -y+1, z$ ; #3  $-x+1, -y+1, -z+1$ ; #4  $-x+1, y, -z+1$ ; #5  $-x+2, -y+1, -z+3$ ; #6  $-x+2, y, -z+3$ .

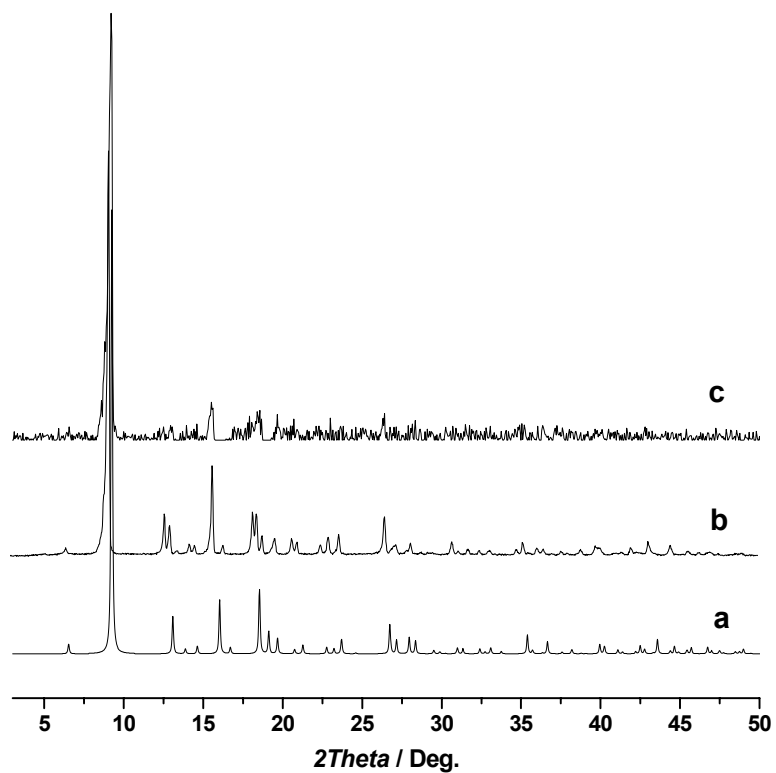

**Figure 1S** PXR D patterns of **1**: (a) simulated from crystallographic CIF file, (b) as made, and (c) after removal of the guest molecules.

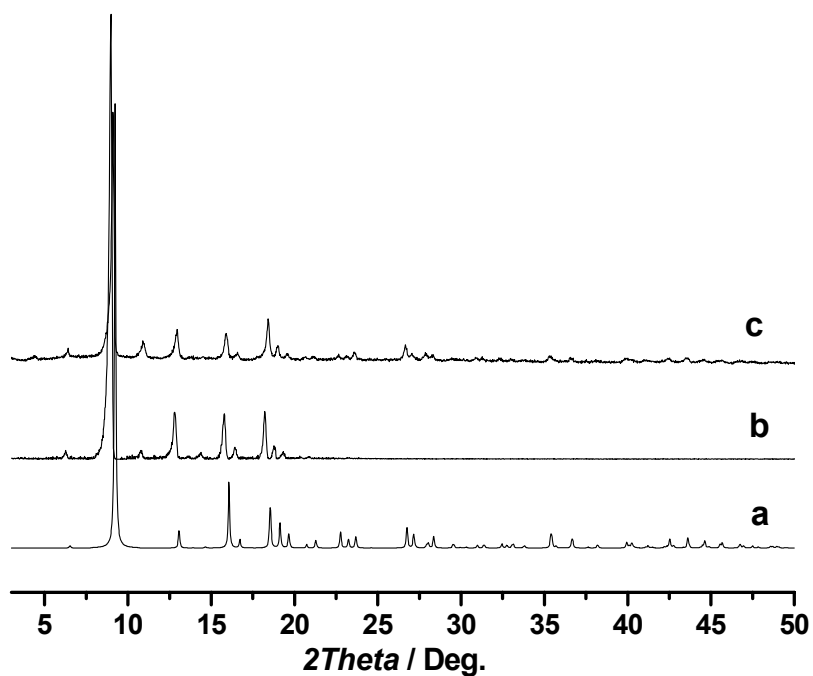

**Figure 2S** PXR D patterns of **2**: (a) simulated from crystallographic CIF file, (b) as made, and (c) after removal of the solvent molecules.



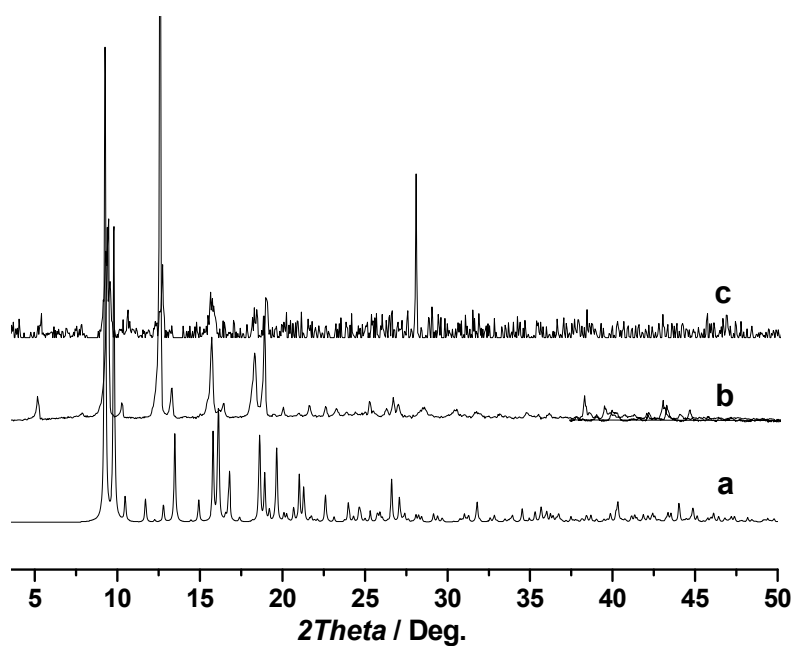

**Figure 3S** PXR D patterns of **3**: (a) simulated from crystallographic CIF file, (b) as made, and (c) after removal of the guest molecules.

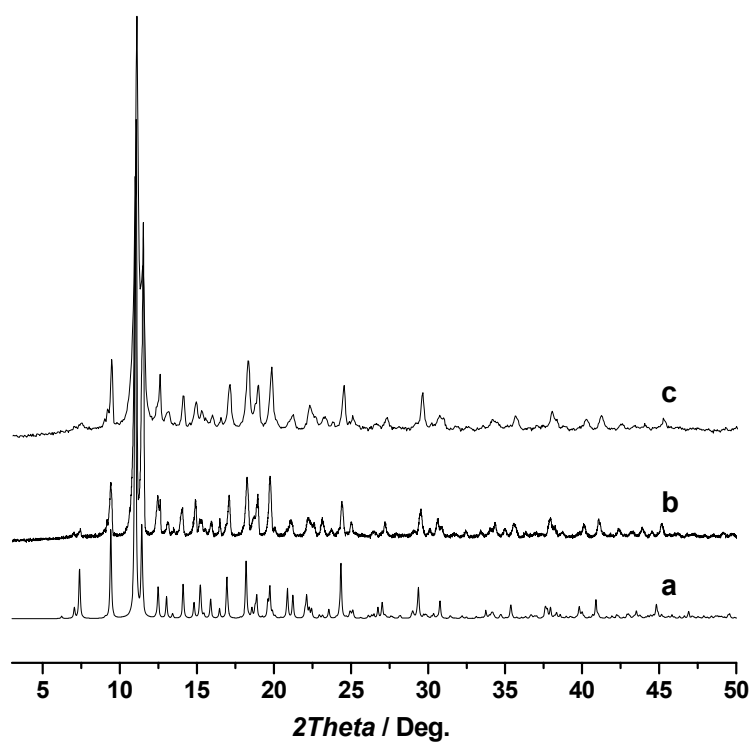

**Figure 4S** PXR D patterns of **4**: (a) simulated from crystallographic CIF file, (b) as made, and (c) after removal of the guest molecules.
